# Supplementary material
Source: Springer Nature journal article supplement (https://www.springermedizin.de/resource/supplementary/12913_2008_887_MOESM7_ESM.pdf/9536174)

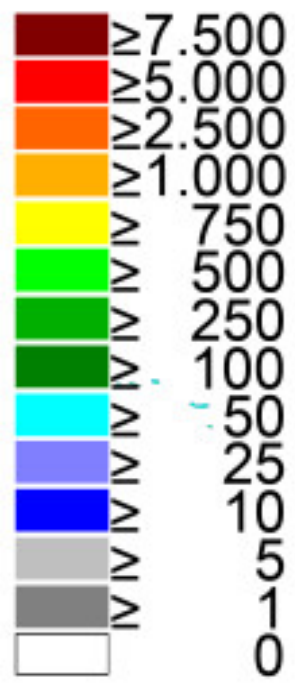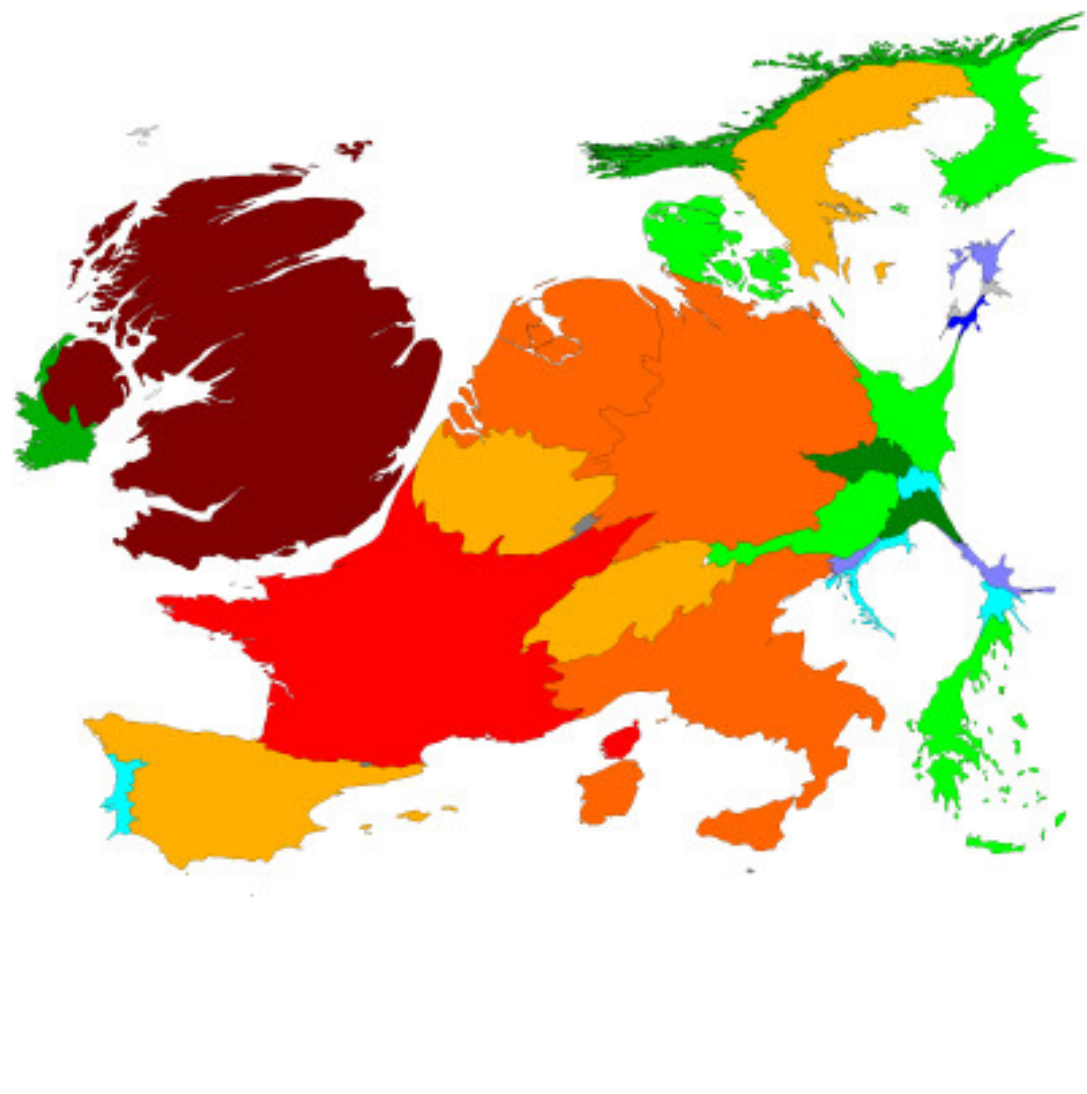

Supplement: MOESM7 [file 9536174]
